# Supplementary material for: Immunology of THymectomy And childhood CArdiac transplant (ITHACA): protocol for a UK-wide prospective observational cohort study to identify immunological risk factors of post-transplant lymphoproliferative disease (PTLD) in thymectomised children
Source: PubMed Central journal article supplement (PMC10603490; doi:10.1136/bmjopen-2023-079582), 2023-10-20
Supplement: bmjopen-2023-079582.draft_revisions.pdf [file bmjopen-2023-079582.draft_revisions.pdf]

# BMJ Open

BMJ Open is committed to open peer review. As part of this commitment we make the peer review history of every article we publish publicly available.

When an article is published we post the peer reviewers' comments and the authors' responses online. We also post the versions of the paper that were used during peer review. These are the versions that the peer review comments apply to.

The versions of the paper that follow are the versions that were submitted during the peer review process. They are not the versions of record or the final published versions. They should not be cited or distributed as the published version of this manuscript.

BMJ Open is an open access journal and the full, final, typeset and author-corrected version of record of the manuscript is available on our site with no access controls, subscription charges or pay-per-view fees (<http://bmjopen.bmj.com>).

If you have any questions on BMJ Open's open peer review process please email [info.bmjopen@bmj.com](mailto:info.bmjopen@bmj.com)

# BMJ Open

**The Immunology of Thymectomy And childhood Cardiac transplant (ITHACA): Protocol for a prospective nationwide cohort study to identify immunological risk factors of post-transplant lymphoproliferative disease (PTLD) in thymectomised children.**

|                               |                                                                                                                                                                                                                                                                                                                                                                                                                                                                                                                                                                                                                                                                                                                                                                                                                                                                                                                                                                                                                                                                                                                                                                                                                                                                                                                                                                                                                                                                                                                                                                                                                                                                                                                                                                                                                                                           |
|-------------------------------|-----------------------------------------------------------------------------------------------------------------------------------------------------------------------------------------------------------------------------------------------------------------------------------------------------------------------------------------------------------------------------------------------------------------------------------------------------------------------------------------------------------------------------------------------------------------------------------------------------------------------------------------------------------------------------------------------------------------------------------------------------------------------------------------------------------------------------------------------------------------------------------------------------------------------------------------------------------------------------------------------------------------------------------------------------------------------------------------------------------------------------------------------------------------------------------------------------------------------------------------------------------------------------------------------------------------------------------------------------------------------------------------------------------------------------------------------------------------------------------------------------------------------------------------------------------------------------------------------------------------------------------------------------------------------------------------------------------------------------------------------------------------------------------------------------------------------------------------------------------|
| Journal:                      | <i>BMJ Open</i>                                                                                                                                                                                                                                                                                                                                                                                                                                                                                                                                                                                                                                                                                                                                                                                                                                                                                                                                                                                                                                                                                                                                                                                                                                                                                                                                                                                                                                                                                                                                                                                                                                                                                                                                                                                                                                           |
| Manuscript ID                 | bmjopen-2023-079582                                                                                                                                                                                                                                                                                                                                                                                                                                                                                                                                                                                                                                                                                                                                                                                                                                                                                                                                                                                                                                                                                                                                                                                                                                                                                                                                                                                                                                                                                                                                                                                                                                                                                                                                                                                                                                       |
| Article Type:                 | Protocol                                                                                                                                                                                                                                                                                                                                                                                                                                                                                                                                                                                                                                                                                                                                                                                                                                                                                                                                                                                                                                                                                                                                                                                                                                                                                                                                                                                                                                                                                                                                                                                                                                                                                                                                                                                                                                                  |
| Date Submitted by the Author: | 05-Sep-2023                                                                                                                                                                                                                                                                                                                                                                                                                                                                                                                                                                                                                                                                                                                                                                                                                                                                                                                                                                                                                                                                                                                                                                                                                                                                                                                                                                                                                                                                                                                                                                                                                                                                                                                                                                                                                                               |
| Complete List of Authors:     | <p>Offor, Ugonna; Newcastle University Faculty of Medical Sciences, Wolfson Childhood Cancer Research Centre, Translational and Clinical Research Institute.; Great North Children's Hospital, Department of Paediatric Haematology and Oncology</p> <p>Hollis, Paolo; Great Ormond Street Hospital for Children NHS Foundation Trust, Department of Cardiothoracic Transplant</p> <p>Ognjanovic, Milos; Great North Children's Hospital, Department of Paediatric Nephrology</p> <p>Parry, Gareth; Newcastle Upon Tyne Hospitals NHS Foundation Trust, Department of Cardiopulmonary Transplantation</p> <p>Khushnood, Abbas; Newcastle Upon Tyne Hospitals NHS Foundation Trust, Department of Cardiopulmonary Transplantation</p> <p>Long, Heather; University of Birmingham, Institute of Immunology and Immunotherapy</p> <p>Gennery, Andrew; Newcastle University Faculty of Medical Sciences, Translational and Clinical Research Institute; Great North Children's Hospital, Department of Paediatric Immunology and Haematopoietic Stem Cell Transplantation</p> <p>Bacon, Chris; Newcastle University Faculty of Medical Sciences, Wolfson Childhood Cancer Research Centre, Translational Research and Clinical Research Institute.; Newcastle Upon Tyne Hospitals NHS Foundation Trust, Department of Cellular Pathology</p> <p>Simmonds, Jacob; Great Ormond Street Hospital for Children NHS Foundation Trust, Department of Cardiothoracic Transplant</p> <p>Reinhardt, Zdenka; Newcastle Upon Tyne Hospitals NHS Foundation Trust, Department of Cardiopulmonary Transplantation</p> <p>Bomken, Simon; Newcastle University Faculty of Medical Sciences, Wolfson Childhood Cancer Research Centre, Translational and Clinical Research Institute.; Great North Children's Hospital, Department of Paediatric Haematology and Oncology</p> |
| Keywords:                     | Paediatric transplant surgery < PAEDIATRIC SURGERY, Paediatric oncology < ONCOLOGY, Lymphoma < ONCOLOGY, IMMUNOLOGY, Risk Factors, Observational Study                                                                                                                                                                                                                                                                                                                                                                                                                                                                                                                                                                                                                                                                                                                                                                                                                                                                                                                                                                                                                                                                                                                                                                                                                                                                                                                                                                                                                                                                                                                                                                                                                                                                                                    |
|                               |                                                                                                                                                                                                                                                                                                                                                                                                                                                                                                                                                                                                                                                                                                                                                                                                                                                                                                                                                                                                                                                                                                                                                                                                                                                                                                                                                                                                                                                                                                                                                                                                                                                                                                                                                                                                                                                           |

1  
2  
3  
4  
5  
6  
7  
8  
9  
10  
11  
12  
13  
14  
15  
16  
17  
18  
19  
20  
21  
22  
23  
24  
25  
26  
27  
28  
29  
30  
31  
32  
33  
34  
35  
36  
37  
38  
39  
40  
41  
42  
43  
44  
45  
46  
47  
48  
49  
50  
51  
52  
53  
54  
55  
56  
57  
58  
59  
60

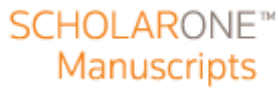

1  
2  
3 **The Immunology of Thymectomy And childhood CARDiac transplant (ITHACA): Protocol for**  
4 **a prospective nationwide cohort study to identify immunological risk factors of post-**  
5 **transplant lymphoproliferative disease (PTLD) in thymectomised children.**  
6  
7

8 Ugonna T Offor<sup>1,2</sup>; Paolo Hollis<sup>3</sup>; Milos Ognjanovic<sup>4</sup>; Gareth Parry<sup>5</sup>; Abbas Khushnood<sup>5</sup>;  
9 Heather M Long<sup>6</sup>; Andrew R Gennery<sup>7,8</sup>; Chris M Bacon<sup>1,9</sup>; Jacob Simmonds<sup>3</sup>; Zdenka  
10 Reinhardt<sup>5</sup>; Simon Bomken<sup>1,2</sup>.  
11  
12  
13  
14  
15

16 <sup>1</sup>Wolfson Childhood Cancer Research Centre, Translational and Clinical Research Institute,  
17 Newcastle University, Newcastle upon Tyne, United Kingdom.  
18

19 <sup>2</sup>Department of Paediatric Haematology and Oncology, The Great North Children's Hospital,  
20 Newcastle upon Tyne Hospitals NHS Foundation Trust, Newcastle upon Tyne, United  
21 Kingdom.  
22  
23  
24

25 <sup>3</sup>Department of Cardiothoracic Transplant, Great Ormond Street Hospital for Children NHS  
26 Foundation Trust, London, United Kingdom.  
27  
28

29 <sup>4</sup> Department of Paediatric Nephrology, Great North Children's Hospital, Newcastle upon  
30 Tyne Hospitals NHS Foundation Trust, Newcastle upon Tyne, United Kingdom.  
31

32 <sup>5</sup>Department of Cardiopulmonary Transplantation, Newcastle upon Tyne Hospitals NHS  
33 Foundation Trust, Newcastle upon Tyne, United Kingdom.  
34  
35

36 <sup>6</sup>Institute of Immunology and Immunotherapy, University of Birmingham, Birmingham, UK.  
37

38 <sup>7</sup>Translational and Clinical Research Institute, Newcastle University, Newcastle upon Tyne,  
39 United Kingdom.  
40

41 <sup>8</sup>Department of Paediatric Immunology and Haematopoietic Stem Cell Transplantation, The  
42 Great North Children's Hospital, Newcastle upon Tyne Hospitals NHS Foundation Trust,  
43 Newcastle upon Tyne, United Kingdom.  
44  
45  
46

47 <sup>9</sup>Department of Cellular Pathology, Newcastle upon Tyne Hospitals NHS Foundation Trust,  
48 Newcastle upon Tyne, United Kingdom.  
49  
50  
51  
52  
53  
54  
55  
56  
57  
58  
59  
60

## **Abstract**

### Introduction:

Paediatric heart transplant patients are disproportionately affected by Epstein-Barr virus-related posttransplant lymphoproliferative disease (EBV-PTLD) compared to other childhood solid organ recipients. The drivers for this disparity remain poorly understood. A potential risk factor within this cohort is the routine surgical removal of the thymus – a gland critical for the normal development of T-lymphocyte mediated antiviral immunity – in early life, which does not occur in other solid organ transplant recipients. Our study aims to describe the key immunological differences associated with early thymectomy, its impact on the temporal immune response to EBV infection and subsequent risk of PTLD.

### Methods and analysis:

Prospective and sequential immune monitoring will be performed for 34 heart transplant recipients and 6 renal transplant patients (aged 0-18 years), stratified into early (<1-year), late (>1-year) and non-thymectomy groups. Peripheral blood samples and clinical data will be taken before transplant and at 3-, 6-, 12- and 24-months post-transplant. Single cell analysis of circulating immune cells and enumeration of EBV-specific T-lymphocytes will be performed using high dimensional spectral flow cytometry with MHC I/II tetramer assay respectively. EBV antibodies and viral load will be monitored at each of the pre-defined study time points.

### Ethics and dissemination:

Ethical approval for this study has been obtained from the North of Scotland Research Ethics Committee. The results will be disseminated through publications in peer-reviewed journals, presentations at scientific conferences and patient-centred forums, including social media.

Trial registration number: ISRCTN10096625

### Strengths and limitations of this study

- This is the first prospective study to monitor the temporal immune response to EBV infection within a group of patients known to be at a high risk of developing PTLD.
- The integration of data from clinical parameters, in-depth immunophenotyping and EBV-specific T-lymphocyte functional assay permits robust analysis of potential predictive immune biomarkers.
- The multicentre study design optimises recruitment of participants.
- The primary study limitation is the low incidence of paediatric heart transplantation which may affect the rate of study recruitment.

### Introduction

Post-Transplant Lymphoproliferative Disease (PTLD) is the most common childhood cancer in paediatric recipients of a solid organ transplant (SOT). This heterogeneous group of life-threatening lymphoid malignancies is typically driven by Epstein-Barr Virus (EBV) infection.<sup>[1]</sup> PTLD comprises a histological spectrum that ranges from indolent non-destructive B-cell lymphoid infiltrates through to more aggressive and destructive polyclonal or monoclonal B-cell lymphomas e.g., Burkitt lymphoma (BL) and diffuse large B-cell lymphoma (DLBCL). These destructive PTLD subtypes are indistinguishable from high grade mature B-cell lymphomas seen in immunocompetent children.<sup>[2]</sup> Their incidence is allograft-dependent and ranges from 1-2% in renal transplant recipients to as high as 10-15% in heart transplant patients.<sup>[1,3]</sup>

PTLD has one of the worst clinical outcomes amongst childhood lymphomas. The estimated 2-year Event-Free Survival (EFS) is 70% compared to 94% in sporadic cases within the general paediatric population.<sup>[4 - 6]</sup> In even starker contrast is the survival outcome for paediatric heart transplant patients, who ostensibly have an inferior EFS compared to other non-cardiac organ transplants.<sup>[7, 8]</sup> The reasons for this potential disparity are still poorly understood, albeit partly ascribed to a higher incidence of therapeutic complications from organ rejection and treatment-related toxicities.<sup>[9]</sup>

1  
2  
3 The pathogenesis of PTLD is complex and multifactorial. It involves the interplay between  
4 EBV-driven lymphoproliferation, iatrogenic immunosuppression and the suspected functional  
5 exhaustion of T-lymphocytes due to graft-initiated chronic antigen stimulation.<sup>[10]</sup> The role of  
6 EBV is clearly established in children, many of whom experience primary infection from an  
7 EBV-mismatched organ. <sup>[1, 3, 4]</sup> In vitro and in vivo studies focused mainly on adult  
8 monomorphic PTLD have demonstrated distinct patterns of viral protein expression in  
9 infected B-lymphocytes. <sup>[10, 11]</sup> These expression patterns likely influence both the cellular  
10 composition of the tumour immune microenvironment and aberrant immune signalling  
11 which result in immune escape of tumour cells. <sup>[10]</sup>  
12  
13  
14  
15  
16  
17  
18  
19  
20  
21

22 In paediatric heart transplant patients, cardiac surgery via median sternotomy in early  
23 childhood often requires routine thymectomy in order to access the heart and great vessels.  
24 Our earlier study retrospectively examined risk factors for PTLD in the largest UK cohort of  
25 paediatric orthotopic heart transplant (OHT) patients to date.<sup>[3]</sup> The risk of PTLD was found to  
26 be significantly higher in children with congenital heart disease (CHD) [Hazard Ratio = 3.2;  
27 95% CI = 1.4–7.4] and early thymectomy in infancy [Hazard Ratio = 2.7; 95% CI = 1.3–5.2].<sup>[3]</sup>  
28 Furthermore, children with CHD had persistently lower T-lymphocyte counts compared to  
29 children transplanted for acquired cardiomyopathy [CD4+: 430 cell/ $\mu$ l vs 963 cells/ $\mu$ l,  $p < 0.01$   
30 and CD8+: 367 cells/ $\mu$ l vs 765 cells/ $\mu$ l,  $p < 0.01$ ].<sup>[3]</sup> Similar studies have identified marked  
31 phenotypic and functional disruptions to the T-lymphocyte compartment in paediatric heart  
32 transplant patients compared to children receiving a liver or kidney transplant. <sup>[12, 13]</sup>  
33  
34  
35  
36  
37  
38  
39  
40  
41  
42  
43

44 During the first year of life, the thymus plays a crucial role in the development of cell-  
45 mediated immunity, providing a microenvironment for precursor T-lymphocytes to  
46 proliferate and differentiate into mature (naïve) T-lymphocytes.<sup>[14]</sup> Whilst it has been shown  
47 that neonatal thymectomy alone is associated with premature immunosenescence and an  
48 increased risk of viral infections such as Cytomegalovirus (CMV),<sup>[14]</sup> little is known about the  
49 immunological consequences of early thymectomy in immunosuppressed transplant  
50 patients. In particular, there are no data on the synergetic impact of thymectomy and  
51 transplant-related immunosuppression on EBV-specific immunity and the subsequent risk of  
52 developing PTLD.  
53  
54  
55  
56  
57  
58  
59  
60

### Study aims and hypothesis.

This study aims to investigate the development of EBV-specific immune responses following childhood heart transplant. Specifically, it aims to identify the impact of early thymectomy – compounded by iatrogenic immunosuppression – on EBV immunology and the risk of PTLD.

We hypothesise that a combination of early thymectomy and lifelong immunosuppression therapy establishes a tolerogenic immune profile consisting of dysregulated, exhausted and senescent immune cell subsets, poorly able to control EBV infection. This dysfunctional immune microenvironment permits the uncontrolled proliferation of EBV-infected B-lymphocytes and the subsequent development of PTLD.

### Methods and analysis

#### Study design and setting

The Immunology of Thymectomy and Childhood Cardiac Transplant (ITHACA) study is a prospective nationwide cohort study recruiting children (0-18 years) from the two UK centres currently commissioned to provide paediatric heart transplant services: The Freeman Hospital, Newcastle upon Tyne and Great Ormond Street Hospital for Children, London. The study cohort will consist of 34 prospective heart transplant recipients and a non-thymectomy age-matched control group made up of 6 renal transplant recipients. All patients meeting the study's eligibility criteria will be identified and recruited through their local transplant teams at the time of listing for cardiac or renal transplantation.

#### Inclusion Criteria

- Aged 0 – 18 years.
- Actively listed on the NHS Blood and Transplant (NHSBT) waiting list for a primary organ transplant OR awaiting transplant with a living related donor kidney OR recently transplanted with pre-transplant blood samples available.
- Written informed consent.



## Exclusion Criteria

- Has a pre-existing diagnosis of an inherited or acquired immunodeficiency.
- Has an underlying thymic disorder.
- Has previously received a bone marrow or organ transplant.
- Has had a previous cancer diagnosis.
- Withheld consent.
- Weight under 2.5kg.

## Informed consent

Informed consent will be obtained from the parent/carer of the eligible child or from the patient themselves if over the age of 16 years. Assent may be given by children < 16 years of age who wish to do so.

A deferred consent approach will be employed for potential study participants who attend a research site's transplant service for transplantation in a critical/life threatening clinical situation. This will involve the collection of baseline study samples from potential participants at the point of pre-surgical workup without written informed consent being received. Discussion about the study, the giving of participant information sheet (PIS) and receiving of written informed consent/assent will be offered at a more appropriate time before further follow-up blood tests are taken. Such cases will require that the clinical team considers obtaining informed consent prior to transplant to be inappropriate. This will be documented in the patient's clinical notes. Study samples collected under such circumstances will be processed for storage but not analysed until written informed consent is obtained. Any patient who has study samples collected by deferred consent but subsequently declines enrolment in the study will have their samples destroyed in a timely manner according to local laboratory standard operating procedures (SOP). Additional consent will be sought to store specimens for future ethically approved research.

## Assessment and procedures

1  
2  
3 Children will undergo blood sampling for study-specific investigations during routine clinical  
4 visits prior to transplant and at 3-, 6-, 12- and 24-months post-transplant (Figure 1). No  
5 additional study-related hospital visits are planned. Medical therapy will be applied as  
6 clinically indicated and per the local post-transplantation protocols. A total of 5 – 20mls of  
7 blood will be taken at each study time point for all participants. This will coincide with their  
8 usual transplant-related investigations in adherence to WHO guidance for blood sampling in  
9 child health research.<sup>[15]</sup> In the case of a prolonged interval between the pre-transplant blood  
10 sample and subsequent organ transplant (e.g., > 6 months) additional blood samples will be  
11 specifically requested from the patient/parent and verbal consent recorded in the medical  
12 record. Relevant clinical data will also be collected from participants at each study time point  
13 (Supplementary Table 1).  
14  
15  
16  
17  
18  
19  
20  
21  
22  
23  
24  
25

26 Study investigations will consist of:

- 27 • Immunophenotyping of circulating immune cell subsets.
  - 28 • EBV serology.
  - 29 • EBV-specific T-lymphocyte quantification.
  - 30 • EBV-specific T-lymphocyte functional analysis.
- 31  
32  
33  
34  
35  
36  
37  
38

#### 39 Immunophenotyping of circulating immune cell subsets

40  
41 Circulating immune cell populations will be analysed in Newcastle University laboratories.  
42 Mononuclear cells (MNCs) will be isolated and cryopreserved from blood samples taken at  
43 each study time point. Circulating immune cell subsets will be identified within samples using  
44 high dimensional spectral flow cytometry (Aurora system [Cytex]). The 5-laser Aurora spectral  
45 cytometer enables an in-depth analysis of up to 40 cell surface markers at a time.<sup>[16]</sup> This is  
46 highly valuable in phenotypically characterising various immune cell populations and their  
47 subsets (including T-lymphocytes, B-lymphocytes, NK cells and dendritic cells) in low volume  
48 paediatric samples.<sup>[17]</sup> These samples will be analysed simultaneously in batches to mitigate  
49 inter-assay variation. A comprehensive list of cell surface markers has been selected to  
50 comprise the following:  
51  
52  
53  
54  
55  
56  
57  
58  
59

- 60 (i) Major innate/adaptive cell lineages.

- 1
- 2
- 3
- 4 (ii) Main T-lymphocyte subsets as well as putative T-helper subsets.
- 5
- 6 (iii) Recent thymic activity.
- 7
- 8 (iv) Cellular exhaustion and senescence.
- 9
- 10 (v) Key innate/adaptive cells involved in immune response to EBV infection.
- 11
- 12
- 13

#### 14 EBV serology

15  
16 Routine blood samples for evaluation of EBV serology will be tested centrally in the Newcastle  
17 upon Tyne NHS Hospitals Foundation Trust (NUTH) virology laboratories. EBV and CMV viral  
18 load will be measured from whole blood using polymerase chain reaction (PCR) assays. Serum  
19 and/or plasma will be tested for antibody response to key EBV proteins including IgM/IgG for  
20 Viral Capsid Antigen (VCA) and IgG for EBV Nuclear Antigen 1 (EBNA-1). Results for viral load  
21 assay will be reported as total titres while antibody testing will be reported as a binary  
22 detected/not detected based on NUTH laboratories reference cut-off values.  
23  
24  
25  
26  
27  
28  
29  
30

#### 31 EBV-specific T-lymphocyte quantification

32  
33 An optimised panel of HLA-restricted peptide-MHC (pMHC) I/II tetramers will be used to  
34 evaluate EBV-specific CD8 and CD4 T-lymphocyte immunity at the time points outlined in  
35 Figure 1.<sup>[18]</sup> Combinations of differently fluorescently labelled pMHC tetramers presenting  
36 purified peptides of dominant lytic and latent EBV epitopes,<sup>[19]</sup> relevant for the patient HLA  
37 genotype, will be included in the T-lymphocyte panel. These customised tetramers will be  
38 procured from the National Institute of Health (NIH) Tetramer Core Facility, Atlanta, Georgia,  
39 USA.  
40  
41  
42  
43  
44  
45  
46  
47  
48

#### 49 EBV-specific T-lymphocyte functional analysis

50  
51 To assess the functional capacity of EBV-specific T-lymphocytes in an HLA-unbiased manner,  
52 effector cytokine production of interferon gamma (IFN- $\gamma$ ) will be determined by ELISpot  
53 following stimulation with pools of overlapping peptides (JPT PepMix™) representing the full  
54 sequences of a panel of EBV latent and lytic cycle proteins.<sup>[20, 21]</sup>  
55  
56  
57  
58  
59  
60

### Data collection

Study data will be collated and managed using Research Electronic Data Capture (REDCap) electronic case report forms (eCRF).<sup>[22]</sup> REDCap is a secure, web-based platform specifically designed to support data acquisition for research studies. It provides restricted user rights to protect identifiable data, including audit trails for tracking data handling and export and procedures for data integration with external sources.<sup>[23]</sup>

### Outcome Measures

#### Primary Outcomes Measures:

- 1) Proportions of circulating innate and adaptive immune cell subsets before and at 3-, 6-, 12- and 24-months post-transplant.
- 2) Frequency of detectable EBV-specific T-lymphocyte immunity.
- 3) Functional capacity of EBV-specific T-lymphocytes.

#### Secondary Outcome Measures:

- 1) Incidence of EBV infection.
- 2) Time from transplantation to EBV viraemia.
- 3) Time from EBV viraemia to seroconversion.

### Data analysis plan

#### Sample size calculation

As the study objectives are largely descriptive, no sample size calculation is necessary. Instead, we selected our sample size such that the study is feasible and large enough to conduct comprehensive analyses. Therefore, our sample size is based on a national average of 30 childhood cardiac transplants per year,<sup>[24]</sup> and a 60% recruitment rate. All eligible patients listed on the National Health Service Blood and Transplant (NHSBT) register will be approached for consent, recognising that not all of these patients will receive a transplant during the lifetime of this study. However, any pre-transplant blood samples that have been obtained are equally important to achieve the study's primary outcome measure.

### Statistical analysis

Data from spectral flow cytometry will be analysed using the OMIQ platform (<https://www.omiq.ai/>). Automated clustering and dimensionality reduction will be used to identify immune cell populations by FlowSOM and Uniform Manifold Approximation and Projection (UMAP) respectively. These techniques overcome the practical challenges associated with manual gating and user bias when analysing datasets from large flow panels. Statistically different immune signatures between patients with early thymectomy and late or non-thymectomy, EBV+ and EBV- serostatus, and between time-points, will be identified by linear and generalised linear mixed models (statistical significance defined as  $p < 0.05$ ). Continuous variables will be assessed by Pearson correlation using the single linkage method to group patients by expression values, and non-continuous variables by non-parametric Spearman correlation, as appropriate. Viral loads will be serially quantified at each study time point to correlate changes in immune responses with the volume of circulating virus-infected cells. Tetrameric frequencies for population groups (e.g., early vs late/non-thymectomy) will be compared using Mann-Whitney U test, and between time-points for paired patient sample using Wilcoxon signed-rank test.

### Patient and public involvement

The Young Person's Advisory Group North England (YPAGne) was involved in the development of the study design, patient facing documents (e.g., PIS) and the informed consent process. Ongoing consultation with YPAGne will continue to influence participant recruitment, outcome measure priorities and the acceptability of study methods.

### Ethics

The ITHACA study has both research governance and ethical approvals (IRAS project ID: 298986; REC reference number: 21/NS/0142) and is adopted onto the National Institute for Health Research (NIHR) Clinical Research Network portfolio. Study organisation and sponsorship will be provided by The Newcastle upon Tyne Hospitals NHS Foundation Trust including coverage of insurance and NHS indemnity.

1  
2  
3 No significant risks are anticipated for enrolled participants. Study samples will be taken at  
4 the same time as routine transplant investigations during clinic visits, thereby avoiding any  
5 additional discomfort or hospital attendance. The estimated volume of study-related blood  
6 samples required at each assessment time point is based on guidance from the World Health  
7 Organisation (WHO) for trial-related blood volumes in children.<sup>[15]</sup> This has been determined  
8 to be safe without any risk of causing anaemia.  
9  
10  
11  
12  
13  
14  
15

### 16 **Dissemination**

17  
18 Study findings will be disseminated widely through publications in high impact peer-reviewed  
19 journals, national and international conferences, and stakeholder events. We will engage  
20 YPAGne to identify patient-centred forums to facilitate discussion of study progress and any  
21 relevant findings with the general public. Published data will be made available via a public  
22 data repository, with a digital object identifier included in any published manuscript to aid  
23 discovery and outline access conditions. Potentially identifiable data, including patient sex,  
24 date of birth and date of transplant will not be shared. Any unpublished data will only be  
25 shared with other parties where a data access agreement has been negotiated by Newcastle  
26 University Legal Services team on behalf of the study's chief investigator (CI).  
27  
28  
29  
30  
31  
32  
33  
34  
35

### 36 **Acknowledgements**

37  
38 The authors thank the study participants and their families. We acknowledge the significant  
39 contribution of the YPAGne team in refining the ITHACA study design. We would also like to  
40 thank Lesley Brindley (Clinical Trials Co-ordinator) and all of the transplant co-ordinators and  
41 transplant nurse specialists for their assistance in the screening and recruitment of study  
42 participants.  
43  
44  
45  
46  
47  
48  
49  
50  
51  
52  
53  
54  
55  
56  
57  
58  
59  
60

## References

1. Mynarek M, Schober T, Behrends, U et al (2013). Posttransplant lymphoproliferative disease after pediatric solid organ transplant. *Clin Dev Immunol*; 814973.
2. Swerdlow SH, Campo E, Harris NL, et al. eds (2017). WHO Classification of Tumours of Haematopoietic and Lymphoid Tissues (Revised 4th edition). Lyon: International Agency for Research on Cancer.
3. Offor UT, Bacon CM, Roberts, J et al (2021). Transplantation for congenital heart disease is associated with an increased risk of EBV-related posttransplant lymphoproliferative disorder in children. *J Heart Lung Transplant*; 40(1): 24 – 32.
4. Schober T, Framke T, Kreipe H et al (2013). Characteristics of early and late PTLD development in pediatric solid organ transplant recipients. *Transplantation*; 95:240–246.
5. Minard-Colin V, Auperin A, Pillon M et al (2020). Rituximab for High-Risk Mature B-Cell Non-Hodgkin Lymphoma in Children. *N Engl J Med*; 382: 2207 – 2219.
6. Gross TG, Orjuela MA, Perkins SL et al (2012). Low-dose chemotherapy and Rituximab for posttransplant lymphoproliferative disease (PTLD): A Children’s Oncology Group Report. *Am J Transplant*; 12(11): 3069 – 3075.
7. Taj MM, Hadzic N, Height SE, et al (2012). Long-term outcome for immune suppression and immune related lymphoproliferative disorder: prospective data from the United Kingdom Children's Leukaemia and Cancer Group registry 1994-2004. *Leuk Lymphoma*; 53(5): 842-848.
8. Manlhiot C, Pollock-Barziv SM, Holmes C, et al (2010). Post-transplant lymphoproliferative disorder in pediatric heart transplant recipients. *J Heart Lung Transplant*; 29: 648 – 657.
9. Webber SA, Naftel DC, Fricker FJ, et al (2006). Lymphoproliferative disorders following pediatric heart transplantation. *Lancet*; 367: 233 – 239.
10. Marcellis L and Tousseyn (2019). The tumour microenvironment in post-transplant lymphoproliferative disorder. *Cancer Microenviron*;12(1):4–16
11. Ferla V, Rossi FG, Goldaniga MC et al (2020). Biological difference between Epstein–Barr virus positive and negative post-transplant lymphoproliferative disorders and their clinical impact. *Front Oncol*; 10: 506.

12. Ekman-Joelsson BM, Brandström P, Allén M et al (2022). Immunological differences between heart- and kidney-transplanted children: a cross-sectional study. *Cardiol Young*; 24: 1 – 6.
13. Yamada M, Macedo C, Louis K et al (2023). Distinct association between chronic EBV infection and T cell compartments from pediatric heart, kidney, and liver transplant recipients. *Am J Transplant*; In press. PMID: 37187296.
14. Deya-Martinez A, Flinn, AM, Gennery AR (2020). Neonatal thymectomy in children – accelerating the immunologic clock? *J Allergy Clin Immunol*; 146(2):236-243.
15. Howie, SRC (2011). Blood sample volumes in child health research: review of safe limits. *Bull World Health Organ*; 89(1): 46 – 53.
16. Park LM, Lannigan J, Jaimes MC (2020). OMIP-069: Forty-Color Full Spectrum Flow Cytometry Panel for Deep Immunophenotyping of Major Cell Subsets in Human Peripheral Blood. *Cytometry A*; 97(10): 1044 – 1051.
17. Xu Q, Milanez-Almeida P, Martins AJ, et al (2023). Adaptive immune responses to SARS-CoV-2 persist in the pharyngeal lymphoid tissue of children. *Nature Immunol*; 24: 186–199.
18. Long HM, Chagoury OL, Leese AM, et al (2013). MHC II tetramers visualize human CD4+ T cell responses to Epstein-Barr virus infection and demonstrate atypical kinetics of the nuclear antigen EBNA1 response. *J Exp Med*; 210(5): 933–949.
19. Taylor GS, Long HM, Brooks JM, et al (2015). The immunology of Epstein-Barr virus-induced disease. *Annu Rev Immunol*; 33: 787 – 821.
20. Zuo J, Dowell AC, Pearce H, et al (2021). Robust SARS-CoV-2-specific T cell immunity is maintained at 6 months following primary infection. *Nat Immunol*; 22(5): 620 – 626.
21. Long HM, Leese AM, Chagoury OL, et al (2011). Cytotoxic CD4+ T cell responses to EBV contrast with CD8 responses in breadth of lytic cycle antigen choice and in lytic cycle recognition. *J Immunol*; 187(1): 92-101.
22. Harris PA, Taylor R, Thielke R, et al (2009). Research electronic data capture (REDCap)—A metadata-driven methodology and workflow process for providing translational research informatics support. *J Biomed Inform*; 42: 377–81.
23. Harris PA, Taylor R, Minor BL, et al (2019). The REDCap Consortium: building an international community of software platform partners. *J Biomed Inform*; 95: 103208.
24. NHS England (2017). [Cardiothoracic Transplantation Service \(Paediatrics\)](#)



### **Funding**

This study is funded by the Lymphoma Research Trust and Cancer Research UK (CRUK) [PHSTU-Hist\100297].

### **Contributors**

UTO and SB conceptualised the study. UTO, SB, CMB, ARG and HML contributed to the study design. SB (CI) and co-applicants UTO, CMB and ARG developed the protocol with contributions from PH, MO, JS and ZR. UTO drafted and prepared the study protocol manuscript and received comments from the co-authors. All authors reviewed and approved the final version of the manuscript for publication.

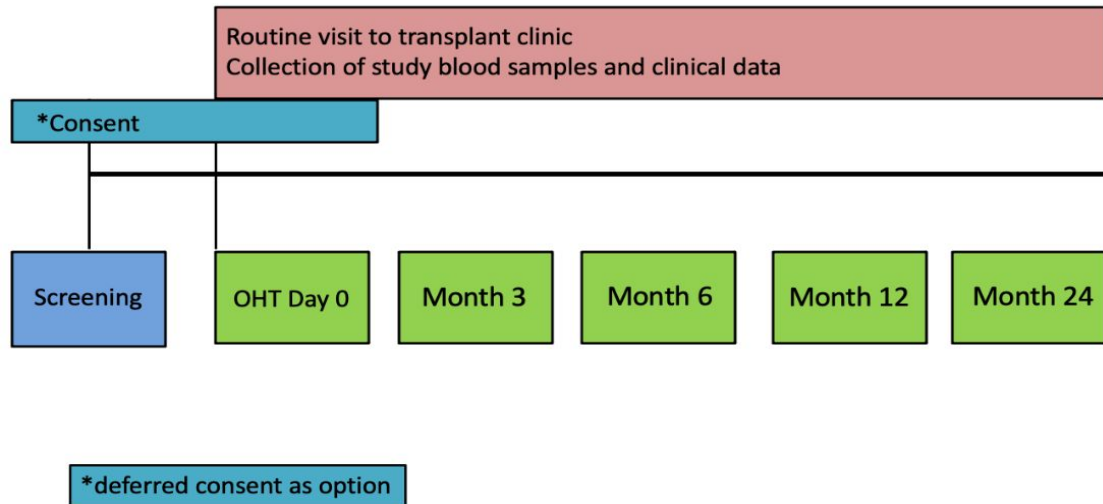

**Figure 1:** ITHACA study flow chart. \*OHT - Orthotopic Heart Transplant

**Supplementary Table 1:** Clinical data collected for the ITHACA Study. \*Age at 1<sup>st</sup> median sternotomy is an agreed proxy where thymectomy isn't clearly documented in the patient's surgical notes.

| Category                    | Clinical data                                                                                                                                                                                                     |
|-----------------------------|-------------------------------------------------------------------------------------------------------------------------------------------------------------------------------------------------------------------|
| I. Baseline patient details | Age at transplant, Age at thymectomy*, Cardiothoracic procedure at time of thymectomy, Sex, Ethnicity, Weight, Height, Comorbidities prior to transplantation, Concomitant medication at time of transplantation. |
| II. Transplant-related      | Cardiac/Renal diagnosis, Indication for transplant, Blood group compatibility.                                                                                                                                    |
| III. Infection-related      | EBV and CMV (where available) serostatus of donor & recipient at transplant.                                                                                                                                      |
| IV. Immunosuppression       | Induction therapy, maintenance immunosuppression drugs (dose and trough levels at each follow up visit), changes to maintenance immunosuppression drugs and indication for changes.                               |
| V. Complications            | Opportunistic infections, Graft failure/rejection, PTLD, Mortality, documentation of "other" complications.                                                                                                       |
| VI. Follow up               | Weight, Height, Additional medication, Relevant additional comments (also see categories IV & V)                                                                                                                  |

# BMJ Open

## The Immunology of Thymectomy And childhood Cardiac transplant (ITHACA): Protocol for a UK-wide prospective observational cohort study to identify immunological risk factors of post-transplant lymphoproliferative disease (PTLD) in thymectomised children.

|                                 |                                                                                                                                                                                                                                                                                                                                                                                                                                                                                                                                                                                                                                                                                                                                                                                                                                                                                                                                                                                                                                                                                                                                                                                                                                                                                                                                                                                                                                                                                                                                                                                                                                                                                                                                                                                                                                                           |
|---------------------------------|-----------------------------------------------------------------------------------------------------------------------------------------------------------------------------------------------------------------------------------------------------------------------------------------------------------------------------------------------------------------------------------------------------------------------------------------------------------------------------------------------------------------------------------------------------------------------------------------------------------------------------------------------------------------------------------------------------------------------------------------------------------------------------------------------------------------------------------------------------------------------------------------------------------------------------------------------------------------------------------------------------------------------------------------------------------------------------------------------------------------------------------------------------------------------------------------------------------------------------------------------------------------------------------------------------------------------------------------------------------------------------------------------------------------------------------------------------------------------------------------------------------------------------------------------------------------------------------------------------------------------------------------------------------------------------------------------------------------------------------------------------------------------------------------------------------------------------------------------------------|
| Journal:                        | <i>BMJ Open</i>                                                                                                                                                                                                                                                                                                                                                                                                                                                                                                                                                                                                                                                                                                                                                                                                                                                                                                                                                                                                                                                                                                                                                                                                                                                                                                                                                                                                                                                                                                                                                                                                                                                                                                                                                                                                                                           |
| Manuscript ID                   | bmjopen-2023-079582.R1                                                                                                                                                                                                                                                                                                                                                                                                                                                                                                                                                                                                                                                                                                                                                                                                                                                                                                                                                                                                                                                                                                                                                                                                                                                                                                                                                                                                                                                                                                                                                                                                                                                                                                                                                                                                                                    |
| Article Type:                   | Protocol                                                                                                                                                                                                                                                                                                                                                                                                                                                                                                                                                                                                                                                                                                                                                                                                                                                                                                                                                                                                                                                                                                                                                                                                                                                                                                                                                                                                                                                                                                                                                                                                                                                                                                                                                                                                                                                  |
| Date Submitted by the Author:   | 04-Oct-2023                                                                                                                                                                                                                                                                                                                                                                                                                                                                                                                                                                                                                                                                                                                                                                                                                                                                                                                                                                                                                                                                                                                                                                                                                                                                                                                                                                                                                                                                                                                                                                                                                                                                                                                                                                                                                                               |
| Complete List of Authors:       | <p>Offor, Ugonna; Newcastle University Faculty of Medical Sciences, Wolfson Childhood Cancer Research Centre, Translational and Clinical Research Institute.; Great North Children's Hospital, Department of Paediatric Haematology and Oncology</p> <p>Hollis, Paolo; Great Ormond Street Hospital for Children NHS Foundation Trust, Department of Cardiothoracic Transplant</p> <p>Ognjanovic, Milos; Great North Children's Hospital, Department of Paediatric Nephrology</p> <p>Parry, Gareth; Newcastle Upon Tyne Hospitals NHS Foundation Trust, Department of Cardiopulmonary Transplantation</p> <p>Khushnood, Abbas; Newcastle Upon Tyne Hospitals NHS Foundation Trust, Department of Cardiopulmonary Transplantation</p> <p>Long, Heather; University of Birmingham, Institute of Immunology and Immunotherapy</p> <p>Gennery, Andrew; Newcastle University Faculty of Medical Sciences, Translational and Clinical Research Institute; Great North Children's Hospital, Department of Paediatric Immunology and Haematopoietic Stem Cell Transplantation</p> <p>Bacon, Chris; Newcastle University Faculty of Medical Sciences, Wolfson Childhood Cancer Research Centre, Translational Research and Clinical Research Institute.; Newcastle Upon Tyne Hospitals NHS Foundation Trust, Department of Cellular Pathology</p> <p>Simmonds, Jacob; Great Ormond Street Hospital for Children NHS Foundation Trust, Department of Cardiothoracic Transplant</p> <p>Reinhardt, Zdenka; Newcastle Upon Tyne Hospitals NHS Foundation Trust, Department of Cardiopulmonary Transplantation</p> <p>Bomken, Simon; Newcastle University Faculty of Medical Sciences, Wolfson Childhood Cancer Research Centre, Translational and Clinical Research Institute.; Great North Children's Hospital, Department of Paediatric Haematology and Oncology</p> |
| <b>Primary Subject Heading</b>: | Paediatrics                                                                                                                                                                                                                                                                                                                                                                                                                                                                                                                                                                                                                                                                                                                                                                                                                                                                                                                                                                                                                                                                                                                                                                                                                                                                                                                                                                                                                                                                                                                                                                                                                                                                                                                                                                                                                                               |
| Secondary Subject Heading:      | Oncology, Immunology (including allergy), Infectious diseases                                                                                                                                                                                                                                                                                                                                                                                                                                                                                                                                                                                                                                                                                                                                                                                                                                                                                                                                                                                                                                                                                                                                                                                                                                                                                                                                                                                                                                                                                                                                                                                                                                                                                                                                                                                             |
| Keywords:                       | Paediatric transplant surgery < PAEDIATRIC SURGERY, Paediatric                                                                                                                                                                                                                                                                                                                                                                                                                                                                                                                                                                                                                                                                                                                                                                                                                                                                                                                                                                                                                                                                                                                                                                                                                                                                                                                                                                                                                                                                                                                                                                                                                                                                                                                                                                                            |

1  
2  
3  
4  
5  
6  
7  
8  
9  
10  
11  
12  
13  
14  
15  
16  
17  
18  
19  
20  
21  
22  
23  
24  
25  
26  
27  
28  
29  
30  
31  
32  
33  
34  
35  
36  
37  
38  
39  
40  
41  
42  
43  
44  
45  
46  
47  
48  
49  
50  
51  
52  
53  
54  
55  
56  
57  
58  
59  
60

|  |                                                                                         |
|--|-----------------------------------------------------------------------------------------|
|  | oncology < ONCOLOGY, Lymphoma < ONCOLOGY, IMMUNOLOGY, Risk Factors, Observational Study |
|  |                                                                                         |

SCHOLARONE™  
Manuscripts

1  
2  
3 **The Immunology of THymectomy And childhood CARDiac transplant (ITHACA): Protocol for**  
4 **a UK-wide prospective observational cohort study to identify immunological risk factors of**  
5 **post-transplant lymphoproliferative disease (PTLD) in thymectomised children.**  
6  
7

8 Ugonna T Offor<sup>1,2</sup>; Paolo Hollis<sup>3</sup>; Milos Ognjanovic<sup>4</sup>; Gareth Parry<sup>5</sup>; Abbas Khushnood<sup>5</sup>;  
9 Heather M Long<sup>6</sup>; Andrew R Gennery<sup>7,8</sup>; Chris M Bacon<sup>1,9</sup>; Jacob Simmonds<sup>3</sup>; Zdenka  
10 Reinhardt<sup>5</sup>; Simon Bomken<sup>1,2</sup>.  
11  
12  
13

14 **Correspondence to Dr Ugonna T Offor:** ugo.offor@newcastle.ac.uk  
15  
16  
17

18 <sup>1</sup>Wolfson Childhood Cancer Research Centre, Translational and Clinical Research Institute,  
19 Newcastle University, Newcastle upon Tyne, United Kingdom.  
20

21 <sup>2</sup>Department of Paediatric Haematology and Oncology, The Great North Children's Hospital,  
22 Newcastle upon Tyne Hospitals NHS Foundation Trust, Newcastle upon Tyne, United Kingdom.  
23

24 <sup>3</sup>Department of Cardiothoracic Transplant, Great Ormond Street Hospital for Children NHS  
25 Foundation Trust, London, United Kingdom.  
26

27 <sup>4</sup>Department of Paediatric Nephrology, Great North Children's Hospital, Newcastle upon Tyne  
28 Hospitals NHS Foundation Trust, Newcastle upon Tyne, United Kingdom.  
29

30 <sup>5</sup>Department of Cardiopulmonary Transplantation, Newcastle upon Tyne Hospitals NHS  
31 Foundation Trust, Newcastle upon Tyne, United Kingdom.  
32

33 <sup>6</sup>Institute of Immunology and Immunotherapy, University of Birmingham, Birmingham, UK.  
34

35 <sup>7</sup>Translational and Clinical Research Institute, Newcastle University, Newcastle upon Tyne,  
36 United Kingdom.  
37

38 <sup>8</sup>Department of Paediatric Immunology and Haematopoietic Stem Cell Transplantation, The  
39 Great North Children's Hospital, Newcastle upon Tyne Hospitals NHS Foundation Trust,  
40 Newcastle upon Tyne, United Kingdom.  
41

42 <sup>9</sup>Department of Cellular Pathology, Newcastle upon Tyne Hospitals NHS Foundation Trust,  
43 Newcastle upon Tyne, United Kingdom.  
44  
45  
46  
47  
48  
49  
50  
51  
52  
53  
54  
55  
56  
57  
58  
59  
60

## **Abstract**

### Introduction:

Paediatric heart transplant patients are disproportionately affected by Epstein-Barr virus-related posttransplant lymphoproliferative disease (EBV-PTLD) compared to other childhood solid organ recipients. The drivers for this disparity remain poorly understood. A potential risk factor within this cohort is the routine surgical removal of the thymus – a gland critical for the normal development of T-lymphocyte mediated antiviral immunity – in early life, which does not occur in other solid organ transplant recipients. Our study aims to describe the key immunological differences associated with early thymectomy, its impact on the temporal immune response to EBV infection and subsequent risk of PTLD.

### Methods and analysis:

Prospective and sequential immune monitoring will be performed for 34 heart transplant recipients and 6 renal transplant patients (aged 0-18 years), stratified into early (<1-year), late (>1-year) and non-thymectomy groups. Peripheral blood samples and clinical data will be taken before transplant and at 3-, 6-, 12- and 24-months post-transplant. Single cell analysis of circulating immune cells and enumeration of EBV-specific T-lymphocytes will be performed using high dimensional spectral flow cytometry with MHC I/II tetramer assay respectively. EBV antibodies and viral load will be monitored at each of the pre-defined study time points.

### Ethics and dissemination:

Ethical approval for this study has been obtained from the North of Scotland Research Ethics Committee. The results will be disseminated through publications in peer-reviewed journals, presentations at scientific conferences and patient-centred forums, including social media.

Trial registration number: ISRCTN10096625

### Strengths and limitations of this study

- This is the first prospective study to monitor the temporal immune response to EBV infection within a group of patients known to be at a high risk of developing PTLD.
- The integration of data from clinical parameters, in-depth immunophenotyping and EBV-specific T-lymphocyte functional assay permits robust analysis of potential predictive immune biomarkers.
- The multicentre study design optimises recruitment of participants.
- The primary study limitation is the low incidence of paediatric heart transplantation which may affect the rate of study recruitment.

### Introduction

Post-Transplant Lymphoproliferative Disease (PTLD) is the most common childhood cancer in paediatric recipients of a solid organ transplant (SOT). This heterogeneous group of life-threatening lymphoid malignancies is typically driven by Epstein-Barr Virus (EBV) infection.[1] PTLD comprises a histological spectrum that ranges from indolent non-destructive B-cell lymphoid infiltrates through to more aggressive and destructive polyclonal or monoclonal B-cell lymphomas e.g., Burkitt lymphoma (BL) and diffuse large B-cell lymphoma (DLBCL). These destructive PTLD subtypes are indistinguishable from high grade mature B-cell lymphomas seen in immunocompetent children.[2] Their incidence is allograft-dependent and ranges from 1-2% in renal transplant recipients to as high as 10-15% in heart transplant patients.[1,3]

PTLD has one of the worst clinical outcomes amongst childhood lymphomas. The estimated 2-year Event-Free Survival (EFS) is 70% compared to 94% in sporadic cases within the general paediatric population.[4 – 6] In even starker contrast is the survival outcome for paediatric heart transplant patients, who ostensibly have an inferior EFS compared to other non-cardiac organ transplants.[7, 8] The reasons for this potential disparity are still poorly understood, albeit partly ascribed to a higher incidence of therapeutic complications from organ rejection and treatment-related toxicities.[9]

The pathogenesis of PTLD is complex and multifactorial. It involves the interplay between EBV-driven lymphoproliferation, iatrogenic immunosuppression and the suspected functional



1  
2  
3 exhaustion of T-lymphocytes due to graft-initiated chronic antigen stimulation.[10] The role of  
4 EBV is clearly established in children, many of whom experience primary infection from an  
5 EBV-mismatched organ.[1, 3, 4] In vitro and in vivo studies focused mainly on adult  
6 monomorphic PTLD have demonstrated distinct patterns of viral protein expression in infected  
7 B-lymphocytes.[10, 11] These expression patterns likely influence both the cellular  
8 composition of the tumour immune microenvironment and aberrant immune signalling which  
9 result in immune escape of tumour cells.[10]  
10  
11  
12  
13  
14  
15  
16  
17

18 In paediatric heart transplant patients, cardiac surgery via median sternotomy in early  
19 childhood often requires routine thymectomy in order to access the heart and great vessels.  
20 Our earlier study retrospectively examined risk factors for PTLD in the largest UK cohort of  
21 paediatric orthotopic heart transplant (OHT) patients to date.[3] The risk of PTLD was found  
22 to be significantly higher in children with congenital heart disease (CHD) [Hazard Ratio = 3.2;  
23 95% CI = 1.4–7.4] and early thymectomy in infancy [Hazard Ratio = 2.7; 95% CI = 1.3–5.2].[3]  
24 Furthermore, children with CHD had persistently lower T-lymphocyte counts compared to  
25 children transplanted for acquired cardiomyopathy [CD4+: 430 cell/ $\mu$ l vs 963 cells/ $\mu$ l,  $p < 0.01$   
26 and CD8+: 367 cells/ $\mu$ l vs 765 cells/ $\mu$ l,  $p < 0.01$ ].[3] Similar studies have identified marked  
27 phenotypic and functional disruptions to the T-lymphocyte compartment in paediatric heart  
28 transplant patients compared to children receiving a liver or kidney transplant. [12, 13]  
29  
30  
31  
32  
33  
34  
35  
36  
37  
38  
39

40 During the first year of life, the thymus plays a crucial role in the development of cell-mediated  
41 immunity, providing a microenvironment for precursor T-lymphocytes to proliferate and  
42 differentiate into mature (naïve) T-lymphocytes.[14] Whilst it has been shown that neonatal  
43 thymectomy alone is associated with premature immunosenescence and an increased risk of  
44 viral infections such as Cytomegalovirus (CMV),[14] little is known about the immunological  
45 consequences of early thymectomy in immunosuppressed transplant patients. In particular,  
46 there are no data on the synergetic impact of thymectomy and transplant-related  
47 immunosuppression on EBV-specific immunity and the subsequent risk of developing PTLD.  
48  
49  
50  
51  
52  
53  
54  
55  
56  
57  
58  
59  
60

### Study aims and hypothesis.

This study aims to investigate the development of EBV-specific immune responses following childhood heart transplant. Specifically, it aims to identify the impact of early thymectomy – compounded by iatrogenic immunosuppression – on EBV immunology and the risk of PTLD.

We hypothesise that a combination of early thymectomy and lifelong immunosuppression therapy establishes a tolerogenic immune profile consisting of dysregulated, exhausted and senescent immune cell subsets, poorly able to control EBV infection. This dysfunctional immune microenvironment permits the uncontrolled proliferation of EBV-infected B-lymphocytes and the subsequent development of PTLD.

### **Methods and analysis**

#### Study design and setting

The Immunology of Thymectomy and Childhood Cardiac Transplant (ITHACA) study is a prospective nationwide cohort study recruiting children (0-18 years) from the two UK centres currently commissioned to provide paediatric heart transplant services: The Freeman Hospital, Newcastle upon Tyne and Great Ormond Street Hospital for Children, London. The study cohort will consist of 34 prospective heart transplant recipients and a non-thymectomy age-matched control group made up of 6 renal transplant recipients. All patients meeting the study's eligibility criteria will be identified and recruited through their local transplant teams at the time of listing for cardiac or renal transplantation. The study opened to patient recruitment in March 2022 and is expected to recruit until June 2024.

#### Inclusion Criteria

- Aged 0 – 18 years.
- Actively listed on the NHS Blood and Transplant (NHSBT) waiting list for a primary organ transplant OR awaiting transplant with a living related donor kidney OR recently transplanted with pre-transplant blood samples available.
- Written informed consent.

### Exclusion Criteria

- Has a pre-existing diagnosis of an inherited or acquired immunodeficiency.
- Has an underlying thymic disorder.
- Has previously received a bone marrow or organ transplant.
- Has had a previous cancer diagnosis.
- Withheld consent.
- Weight under 2.5kg.

### Informed consent

Informed consent will be obtained from the parent/carer of the eligible child or from the patient themselves if over the age of 16 years. Assent may be given by children < 16 years of age who wish to do so.

A deferred consent approach will be employed for potential study participants who attend a research site's transplant service for transplantation in a critical/life threatening clinical situation. This will involve the collection of baseline study samples from potential participants at the point of pre-surgical workup without written informed consent being received. Discussion about the study, the giving of participant information sheet (PIS) and receiving of written informed consent/assent will be offered at a more appropriate time before further follow-up blood tests are taken. Such cases will require that the clinical team considers obtaining informed consent prior to transplant to be inappropriate. This will be documented in the patient's clinical notes. Study samples collected under such circumstances will be processed for storage but not analysed until written informed consent is obtained. Any patient who has study samples collected by deferred consent but subsequently declines enrolment in the study will have their samples destroyed in a timely manner according to local laboratory standard operating procedures (SOP). Additional consent will be sought to store specimens for future ethically approved research.

## Assessment and procedures

Children will undergo blood sampling for study-specific investigations during routine clinical visits prior to transplant and at 3-, 6-, 12- and 24-months post-transplant (Figure 1). No additional study-related hospital visits are planned. Medical therapy will be applied as clinically indicated and per the local post-transplantation protocols. A total of 5 – 20mls of blood will be taken at each study time point for all participants. This will coincide with their usual transplant-related investigations in adherence to WHO guidance for blood sampling in child health research.[15] In the case of a prolonged interval between the pre-transplant blood sample and subsequent organ transplant (e.g., > 6 months) additional blood samples will be specifically requested from the patient/parent and verbal consent recorded in the medical record. Relevant clinical data will also be collected from participants at each study time point (Supplementary Table 1).

Study investigations will consist of:

- Immunophenotyping of circulating immune cell subsets.
- EBV serology.
- EBV-specific T-lymphocyte quantification.
- EBV-specific T-lymphocyte functional analysis.

### Immunophenotyping of circulating immune cell subsets

Circulating immune cell populations will be analysed in Newcastle University laboratories. Mononuclear cells (MNCs) will be isolated and cryopreserved from blood samples taken at each study time point. In addition, biobanked MNC samples from age-matched healthy children will be included for analysis as non-thymectomy, non-transplant controls. Circulating immune cell subsets will be identified within samples using high dimensional spectral flow cytometry (Aurora system [Cytex]). The 5-laser Aurora spectral cytometer enables an in-depth analysis of up to 40 cell surface markers at a time.[16] This is highly valuable in phenotypically characterising various immune cell populations and their subsets (including T-lymphocytes, B-lymphocytes, NK cells and dendritic cells) in low volume paediatric samples.[17] These

1  
2  
3 samples will be analysed simultaneously in batches to mitigate inter-assay variation. A  
4 comprehensive list of cell surface markers has been selected to comprise the following:  
5  
6

- 7 (i) Major innate/adaptive cell lineages.  
8  
9 (ii) Main T-lymphocyte subsets as well as putative T-helper subsets.  
10  
11 (iii) Recent thymic activity.  
12  
13 (iv) Cellular exhaustion and senescence.  
14  
15 (v) Key innate/adaptive cells involved in immune response to EBV infection.  
16  
17

18 Two full spectrum flow panels have been validated for this purpose. A 24-colour panel has  
19 been designed to probe the wider circulating immune landscape of the study cohort (Table  
20 1). This is complemented by a targeted 30-colour T-lymphocyte panel that will elucidate any  
21 temporal changes in the T-lymphocyte compartment after transplantation (Table 2).  
22  
23  
24  
25  
26  
27  
28  
29  
30  
31  
32  
33  
34  
35  
36  
37  
38  
39  
40  
41  
42  
43  
44  
45  
46  
47  
48  
49  
50  
51  
52  
53  
54  
55  
56  
57  
58  
59  
60

**Table 1:** Cell surface markers of interest used in the Broad immune full spectrum flow for the ITHACA study.

| Cell surface marker            | Fluorophore      | Antibody clone | Purpose                                                                      |
|--------------------------------|------------------|----------------|------------------------------------------------------------------------------|
| <b>CD45</b>                    | Spark YG 593     | HI03           | Leucocytes                                                                   |
| <b>TCR<math>\gamma</math>d</b> | PerCP-eFluor 710 | B1.1           | $\gamma$ d T-lymphocyte                                                      |
| <b>CD3</b>                     | BV 510           | SK7            | Pan T cell, NK T-like cells                                                  |
| <b>CD4</b>                     | PerCP            | SK3            | CD4 T helper lymphocytes                                                     |
| <b>CD8</b>                     | BUV 805          | SK1            | CD8 cytotoxic T-lymphocytes                                                  |
| <b>CD11c</b>                   | PE-Cy7           | B-ly6          | Dendritic cell differentiation                                               |
| <b>CD14</b>                    | Spark Blue 550   | 63D3           | Monocyte differentiation                                                     |
| <b>CD16</b>                    | BUV 496          | 3G8            | Monocyte, NK cell, and Dendritic cell differentiation                        |
| <b>CD19</b>                    | Spark NIR 685    | HIB19          | B lymphocytes                                                                |
| <b>CD20</b>                    | BV 786           | 2H7            | B lymphocytes                                                                |
| <b>CD21</b>                    | PE-Cy5           | B-ly4          | B lymphocyte differentiation                                                 |
| <b>CD24</b>                    | PE-AF 610        | SN3            | B lymphocyte differentiation                                                 |
| <b>CD27</b>                    | APC-H7           | M-T271         | T/B lymphocyte differentiation                                               |
| <b>CD38</b>                    | APC-Fire 810     | HIT2           | Monocyte, Dendritic cell, T/B lymphocyte activation and differentiation      |
| <b>CD56</b>                    | BUV 737          | NCAM16.2       | NK cells                                                                     |
| <b>CD57</b>                    | Pacific Blue     | NK-1           | NK and CD8 T lymphocyte immune senescence                                    |
| <b>CD123</b>                   | Super Bright 436 | 6H6            | Plasmacytoid dendritic cells                                                 |
| <b>CD127</b>                   | APC-R700         | HIL-7R-M21     | Cytokine receptor; T lymphocyte differentiation                              |
| <b>KIR (CD158)</b>             | BUV 605          | DX27           | NK cells                                                                     |
| <b>NKG2A (CD159a)</b>          | APC              | REA110         | NK cells                                                                     |
| <b>NKG2C (CD159c)</b>          | PE               | REA205         | NK cells                                                                     |
| <b>IgD</b>                     | BV 480           | IA6-2          | B lymphocyte differentiation                                                 |
| <b>IgM</b>                     | BV 570           | MHM-88         | B lymphocyte differentiation                                                 |
| <b>HLA-DR</b>                  | PE-Fire 810      | L243           | Monocyte activation, dendritic cell lineage, NK cell lineage discrimination, |
| <b>Viability</b>               | Live/Dead Blue   | -              | Live cells                                                                   |

**Table 2:** Cell surface markers of interest used in the T lymphocyte full spectrum flow panel for the ITHACA study.

| Cell surface marker            | Fluorophore      | Antibody clone | Purpose                                          |
|--------------------------------|------------------|----------------|--------------------------------------------------|
| <b>CD45</b>                    | Spark YG 593     | HI03           | Leucocytes                                       |
| <b>CD45RA</b>                  | BUV 395          | 5H9            | T lymphocyte differentiation                     |
| <b>CD3</b>                     | BV510            | SK7            | Pan T cell, NK T-like cells                      |
| <b>CD4</b>                     | PerCP            | SK3            | CD4 T helper lymphocytes                         |
| <b>CD8</b>                     | BUV 805          | SK1            | CD8 cytotoxic T lymphocytes                      |
| <b>TCR<math>\gamma</math>d</b> | PerCP-eFluor 710 | B1.1           | $\gamma$ d T lymphocyte                          |
| <b>CD25</b>                    | PE-AF700         | CD25-3G10      | Regulatory T lymphocytes                         |
| <b>CD27</b>                    | APC-H7           | M-T271         | T lymphocyte differentiation                     |
| <b>CD28</b>                    | BV650            | CD28.2         | T lymphocyte differentiation                     |
| <b>CD31</b>                    | BV711            | WM59           | Recent thymic emigrants                          |
| <b>CD38</b>                    | APC-Fire 810     | HIT2           | T lymphocyte activation/differentiation          |
| <b>CD39</b>                    | BUV 661          | TU66           | Regulatory T lymphocytes                         |
| <b>CD57</b>                    | Pacific Blue     | NK-1           | CD8 T lymphocyte immune senescence               |
| <b>CD62L</b>                   | BUV 496          | SK-11          | T lymphocyte differentiation                     |
| <b>CD69</b>                    | AF 647           | FN50           | T lymphocyte activation                          |
| <b>CD95</b>                    | PE-Cy5           | DX2            | T lymphocyte activation/differentiation          |
| <b>CD127</b>                   | APC-R700         | HIL-7R-M21     | Chemokine receptor; T lymphocyte differentiation |
| <b>HLA-DR</b>                  | PE-Fire 810      | L243           | T lymphocyte activation                          |
| <b>CCR4</b>                    | BB 700           | 1G1            | Chemokine receptor; T lymphocyte differentiation |
| <b>CCR5</b>                    | BUV 563          | 2D7/CCR5       | Chemokine receptor; T lymphocyte differentiation |
| <b>CCR6</b>                    | BV 480           | 140706         | Chemokine receptor; T lymphocyte differentiation |
| <b>CCR7</b>                    | BV 421           | G043H7         | T lymphocyte differentiation                     |
| <b>CXCR3</b>                   | AF 488           | GH025H7        | Chemokine receptor; T lymphocyte differentiation |
| <b>CXCR5</b>                   | BV 750           | RF8B2          | Chemokine receptor; T lymphocyte differentiation |
| <b>PD-1</b>                    | BV 785           | EH12.2H7       | Co-inhibitory receptor; T lymphocyte exhaustion  |
| <b>LAG-3</b>                   | PE-Cy7           | 3DS223H        | Co-inhibitory receptor; T lymphocyte exhaustion  |
| <b>TIM-3</b>                   | BV 605           | F38-2E2        | Co-inhibitory receptor; T lymphocyte exhaustion  |
| <b>CTLA4</b>                   | PE-CF594         | BNI3           | Co-inhibitory receptor; T lymphocyte exhaustion  |
| <b>Tetramer (lytic)</b>        | APC              | -              | EBV-specific T lymphocytes                       |
| <b>Tetramer (latent)</b>       | PE               | -              | EBV-specific T lymphocytes                       |
| <b>Viability</b>               | Live/Dead Blue   | -              | Live cells                                       |

### EBV serology

Routine blood samples for evaluation of EBV serology will be tested centrally in the Newcastle upon Tyne NHS Hospitals Foundation Trust (NUTH) virology laboratories. EBV and CMV viral load will be measured from whole blood using polymerase chain reaction (PCR) assays. Serum and/or plasma will be tested for antibody response to key EBV proteins including IgM/IgG for Viral Capsid Antigen (VCA) and IgG for EBV Nuclear Antigen 1 (EBNA-1). Results for viral load assay will be reported as total titres while antibody testing will be reported as a binary detected/not detected based on NUTH laboratories reference cut-off values.

### EBV-specific T-lymphocyte quantification

An optimised panel of HLA-restricted peptide-MHC (pMHC) I/II tetramers will be used to evaluate EBV-specific CD8 and CD4 T-lymphocyte immunity at the time points outlined in Figure 1.[18] This panel will be tailored to maximise coverage of participants who have the most commonly expressed HLA genotypes within our study cohort. Combinations of differently fluorescently labelled pMHC tetramers presenting purified peptides of dominant lytic and latent EBV epitopes,[19] relevant for the patient HLA genotype, will be included in the T-lymphocyte panel where applicable (Table 2). These customised tetramers will be procured from the National Institute of Health (NIH) Tetramer Core Facility, Atlanta, Georgia, USA.

### EBV-specific T-lymphocyte functional analysis

To assess the functional capacity of EBV-specific T-lymphocytes in an HLA-unbiased manner, effector cytokine production of interferon gamma (IFN- $\gamma$ ) will be determined by ELISpot following stimulation with pools of overlapping peptides (JPT PepMix™) representing the full sequences of a panel of EBV latent and lytic cycle proteins.[20, 21]

### Data collection

Study data will be collated and managed using Research Electronic Data Capture (REDCap) electronic case report forms (eCRF). [22] REDCap is a secure, web-based platform specifically designed to support data acquisition for research studies. It provides restricted user rights to



1  
2  
3 protect identifiable data, including audit trails for tracking data handling and export and  
4 procedures for data integration with external sources. [23]  
5  
6  
7  
8

### 9 Outcome Measures

10 Primary Outcomes Measures:

- 11 1) Proportions of circulating innate and adaptive immune cell subsets before and at 3-, 6-,  
12 12- and 24-months post-transplant.
- 13 2) Frequency of detectable EBV-specific T-lymphocyte immunity.
- 14 3) Functional capacity of EBV-specific T-lymphocytes.

15  
16  
17  
18  
19  
20  
21 Secondary Outcome Measures:

- 22 1) Incidence of EBV infection.
- 23 2) Time from transplantation to EBV viraemia.
- 24 3) Time from EBV viraemia to seroconversion.

### 25 Data analysis plan

#### 26 Sample size calculation

27  
28  
29  
30  
31  
32  
33  
34 As the study objectives are largely descriptive, no sample size calculation is necessary. Instead,  
35 we selected our sample size such that the study is feasible and large enough to conduct  
36 comprehensive analyses. Therefore, our sample size is based on a national average of 30  
37 childhood cardiac transplants per year, [24] and a 60% recruitment rate. All eligible patients  
38 listed on the National Health Service Blood and Transplant (NHSBT) register will be  
39 approached for consent, recognising that not all of these patients will receive a transplant  
40 during the lifetime of this study. However, any pre-transplant blood samples that have been  
41 obtained are equally important to achieve the study's primary outcome measure.  
42  
43  
44  
45  
46  
47  
48  
49

#### 50 Statistical analysis

51  
52  
53 Data from spectral flow cytometry will be analysed using the OMIQ platform  
54 (<https://www.omiq.ai/>). Automated clustering and dimensionality reduction will be used to  
55 identify immune cell populations by FlowSOM and Uniform Manifold Approximation and  
56 Projection (UMAP) respectively. These techniques overcome the practical challenges  
57 associated with manual gating and user bias when analysing datasets from large flow panels.  
58  
59  
60

1  
2  
3 Statistically different immune signatures between patients with early thymectomy and late or  
4 non-thymectomy, EBV+ and EBV- serostatus, and between time-points, will be identified by  
5 linear and generalised linear mixed models (statistical significance defined as  $p < 0.05$ ).  
6  
7 Continuous variables will be assessed by Pearson correlation using the single linkage method  
8  
9 to group patients by expression values, and non-continuous variables by non-parametric  
10  
11 Spearman correlation, as appropriate. Viral loads will be serially quantified at each study time  
12  
13 point to correlate changes in immune responses with the volume of circulating virus-infected  
14  
15 cells. Tetrameric frequencies for population groups (e.g., early vs late/non-thymectomy) will  
16  
17 be compared using Mann-Whitney U test, and between time-points for paired patient sample  
18  
19 using Wilcoxon signed-rank test.  
20  
21  
22

### 23 Patient and public involvement

24  
25 The Young Person's Advisory Group North England (YPAGne) was involved in the development  
26  
27 of the study design, patient facing documents (e.g., PIS) and the informed consent process.  
28  
29 Ongoing consultation with YPAGne will continue to influence participant recruitment,  
30  
31 outcome measure priorities and the acceptability of study methods.  
32  
33

### 34 Ethics

35  
36 The ITHACA study has both research governance and ethical approvals (IRAS project ID:  
37  
38 298986; REC reference number: 21/NS/0142) and is adopted onto the National Institute for  
39  
40 Health Research (NIHR) Clinical Research Network portfolio. Study organisation and  
41  
42 sponsorship will be provided by The Newcastle upon Tyne Hospitals NHS Foundation Trust  
43  
44 including coverage of insurance and NHS indemnity.  
45  
46

47  
48 No significant risks are anticipated for enrolled participants. Study samples will be taken at  
49  
50 the same time as routine transplant investigations during clinic visits, thereby avoiding any  
51  
52 additional discomfort or hospital attendance. The estimated volume of study-related blood  
53  
54 samples required at each assessment time point is based on guidance from the World Health  
55  
56 Organisation (WHO) for trial-related blood volumes in children. [15] This has been determined  
57  
58 to be safe without any risk of causing anaemia.  
59  
60

## **Dissemination**

Study findings will be disseminated widely through publications in high impact peer-reviewed journals, national and international conferences, and stakeholder events. We will engage YPAGne to identify patient-centred forums to facilitate discussion of study progress and any relevant findings with the general public. Published data will be made available via a public data repository, with a digital object identifier included in any published manuscript to aid discovery and outline access conditions. Potentially identifiable data, including patient sex, date of birth and date of transplant will not be shared. Any unpublished data will only be shared with other parties where a data access agreement has been negotiated by Newcastle University Legal Services team on behalf of the study's chief investigator (CI).

## **Acknowledgements**

The authors thank the study participants and their families. We acknowledge the significant contribution of the YPAGne team in refining the ITHACA study design. We would also like to thank Lesley Brindley (Clinical Trials Co-ordinator) and all of the transplant co-ordinators and transplant nurse specialists for their assistance in the screening and recruitment of study participants.

## **References**

1. Mynarek M, Schober T, Behrends, U et al (2013). Posttransplant lymphoproliferative disease after pediatric solid organ transplant. *Clin Dev Immunol*; 814973.
2. Swerdlow SH, Campo E, Harris NL, et al. eds (2017). WHO Classification of Tumours of Haematopoietic and Lymphoid Tissues (Revised 4th edition). Lyon: International Agency for Research on Cancer.
3. Offor UT, Bacon CM, Roberts, J et al (2021). Transplantation for congenital heart disease is associated with an increased risk of EBV-related posttransplant lymphoproliferative disorder in children. *J Heart Lung Transplant*; 40(1): 24 – 32.
4. Schober T, Framke T, Kreipe H et al (2013). Characteristics of early and late PTLD development in pediatric solid organ transplant recipients. *Transplantation*; 95:240–246.
5. Minard-Colin V, Auperin A, Pillon M et al (2020). Rituximab for High-Risk Mature B-Cell Non-Hodgkin Lymphoma in Children. *N Engl J Med*; 382: 2207 – 2219.

- 1  
2  
3 6. Gross TG, Orjuela MA, Perkins SL et al (2012). Low-dose chemotherapy and Rituximab  
4 for posttransplant lymphoproliferative disease (PTLD): A Children's Oncology Group  
5 Report. *Am J Transplant*; 12(11): 3069 – 3075.
- 6  
7  
8  
9 7. Taj MM, Hadzic N, Height SE, et al (2012). Long-term outcome for immune suppression  
10 and immune related lymphoproliferative disorder: prospective data from the United  
11 Kingdom Children's Leukaemia and Cancer Group registry 1994-2004. *Leuk*  
12 *Lymphoma*; 53(5): 842-848.
- 13  
14  
15  
16 8. Manlhiot C, Pollock-Barziv SM, Holmes C, et al (2010). Post-transplant  
17 lymphoproliferative disorder in pediatric heart transplant recipients. *J Heart Lung*  
18 *Transplant*; 29: 648 – 657.
- 19  
20  
21  
22 9. Webber SA, Naftel DC, Fricker FJ, et al (2006). Lymphoproliferative disorders following  
23 pediatric heart transplantation. *Lancet*; 367: 233 – 239.
- 24  
25  
26  
27 10. Marcellis L and Tousseyn (2019). The tumour microenvironment in post-transplant  
28 lymphoproliferative disorder. *Cancer Microenviron*;12(1):4–16
- 29  
30  
31  
32 11. Ferla V, Rossi FG, Goldaniga MC et al (2020). Biological difference between Epstein–  
33 Barr virus positive and negative post-transplant lymphoproliferative disorders and  
34 their clinical impact. *Front Oncol*; 10: 506.
- 35  
36  
37  
38 12. Ekman-Joelsson BM, Brandström P, Allén M et al (2022). Immunological differences  
39 between heart- and kidney-transplanted children: a cross-sectional study. *Cardiol*  
40 *Young*; 24: 1 – 6.
- 41  
42  
43  
44 13. Yamada M, Macedo C, Louis K et al (2023). Distinct association between chronic EBV  
45 infection and T cell compartments from pediatric heart, kidney, and liver transplant  
46 recipients. *Am J Transplant*; In press. PMID: 37187296.
- 47  
48  
49  
50 14. Deya-Martinez A, Flinn, AM, Gennery AR (2020). Neonatal thymectomy in children –  
51 accelerating the immunologic clock? *J Allergy Clin Immunol*; 146(2):236-243.
- 52  
53  
54  
55 15. Howie, SRC (2011). Blood sample volumes in child health research: review of safe  
56 limits. *Bull World Health Organ*; 89(1): 46 – 53.
- 57  
58  
59  
60 16. Park LM, Lannigan J, Jaimes MC (2020). OMIP-069: Forty-Color Full Spectrum Flow  
Cytometry Panel for Deep Immunophenotyping of Major Cell Subsets in Human  
Peripheral Blood. *Cytometry A*; 97(10): 1044 – 1051.

17. Xu Q, Milanez-Almeida P, Martins AJ, et al (2023). Adaptive immune responses to SARS-CoV-2 persist in the pharyngeal lymphoid tissue of children. *Nature Immunol*; 24: 186–199.
18. Long HM, Chagoury OL, Leese AM, et al (2013). MHC II tetramers visualize human CD4+ T cell responses to Epstein-Barr virus infection and demonstrate atypical kinetics of the nuclear antigen EBNA1 response. *J Exp Med*; 210(5): 933–949.
19. Taylor GS, Long HM, Brooks JM, et al (2015). The immunology of Epstein-Barr virus-induced disease. *Annu Rev Immunol*; 33: 787 – 821.
20. Zuo J, Dowell AC, Pearce H, et al (2021). Robust SARS-CoV-2-specific T cell immunity is maintained at 6 months following primary infection. *Nat Immunol*; 22(5): 620 – 626.
21. Long HM, Leese AM, Chagoury OL, et al (2011). Cytotoxic CD4+ T cell responses to EBV contrast with CD8 responses in breadth of lytic cycle antigen choice and in lytic cycle recognition. *J Immunol*; 187(1): 92-101.
22. Harris PA, Taylor R, Thielke R, et al (2009). Research electronic data capture (REDCap)—A metadata-driven methodology and workflow process for providing translational research informatics support. *J Biomed Inform*; 42: 377–81.
23. Harris PA, Taylor R, Minor BL, et al (2019). The REDCap Consortium: building an international community of software platform partners. *J Biomed Inform*; 95: 103208.
24. NHS England (2017). [Cardiothoracic Transplantation Service \(Paediatrics\)](#)

### **Funding**

This study is funded by the Lymphoma Research Trust (N/A) and Cancer Research UK (CRUK) [PHSTU-Hist\100297]. SB is funded by an MRC Clinician Scientist Fellowship (MR/S021590/1).

### **Contributors**

UTO and SB conceptualised the study. UTO, SB, CMB, ARG and HML contributed to the study design. SB (CI) and co-applicants UTO, CMB and ARG developed the protocol with contributions from PH, MO, GP, AK, JS and ZR. UTO drafted and prepared the study protocol manuscript and received comments from the co-authors. All authors reviewed and approved the final version of the manuscript for publication.

1  
2  
3 **Figure Legend/Caption:**  
4

5 Figure 1: ITHACA study flow chart. \*OHT: Orthotopic Heart Transplant  
6  
7  
8  
9  
10  
11  
12  
13  
14  
15  
16  
17  
18  
19  
20  
21  
22  
23  
24  
25  
26  
27  
28  
29  
30  
31  
32  
33  
34  
35  
36  
37  
38  
39  
40  
41  
42  
43  
44  
45  
46  
47  
48  
49  
50  
51  
52  
53  
54  
55  
56  
57  
58  
59  
60

For peer review only

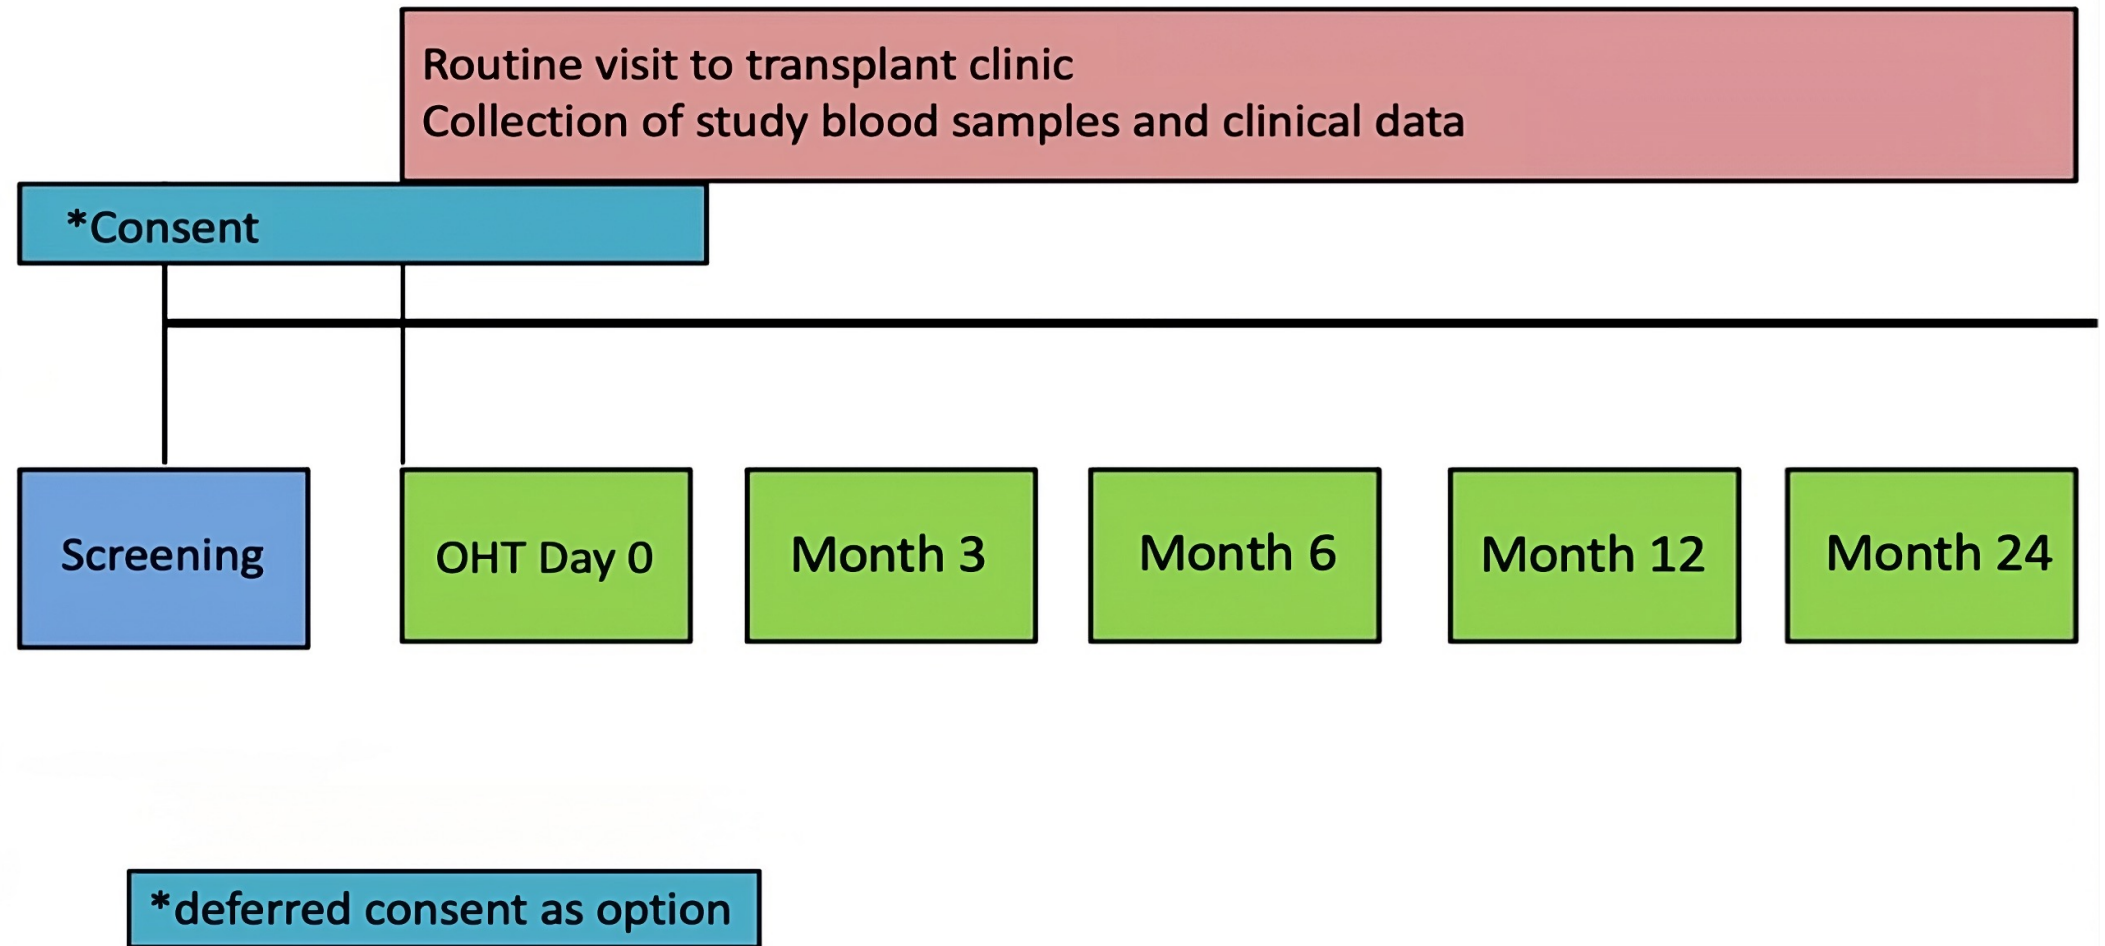

**Supplementary Table 1:** Clinical data collected for the ITHACA Study. \*Age at first median sternotomy is an agreed proxy where thymectomy isn't clearly documented in the patient's surgical notes.

| Category                 | Clinical data                                                                                                                                                                                                                                                                                                        |
|--------------------------|----------------------------------------------------------------------------------------------------------------------------------------------------------------------------------------------------------------------------------------------------------------------------------------------------------------------|
| Baseline patient details | Age at transplant, Age at thymectomy*, Type of thymectomy (Total vs Partial), Type and date of first cardiac surgery (if not transplant), Cardiothoracic procedure at time of thymectomy, Sex, Ethnicity, Weight, Height, Comorbidities prior to transplantation, Concomitant medication at time of transplantation. |
| Transplant-related       | Cardiac/Renal diagnosis, Indication for transplant, Blood group compatibility.                                                                                                                                                                                                                                       |
| Infection-related        | EBV and CMV (where available) serostatus of donor & recipient at transplant.                                                                                                                                                                                                                                         |
| Immunosuppression        | Induction therapy, maintenance immunosuppression drugs (dose and trough levels at each follow up visit), changes to maintenance immunosuppression drugs and indication for changes.                                                                                                                                  |
| Complications            | Opportunistic infections, Graft failure/rejection, PTLD, Mortality, documentation of "other" complications.                                                                                                                                                                                                          |
| Follow up                | Weight, Height, Additional medication, Relevant additional comments (also see categories IV & V)                                                                                                                                                                                                                     |
